# Supplementary material
Source: PubMed Central journal article supplement (PMC9940822)
Supplement: NIHMS1825351-supplement-Supplementary.pdf [file NIHMS1825351-supplement-Supplementary.pdf]

## **Supplement 1**

### Description of Measures Included:

#### *Cognitive Functioning:*

##### *Mullen Scales of Early Learning (Mullen, 1995; MSEL)*

The MSEL was administered by a trained clinician at study entry to provide an estimate of verbal and nonverbal functioning. The MSEL is a standardized measure for young child 0-68 months of age. Four subscales were administered to provide measures of nonverbal (Visual Reception, Fine Motor) and verbal abilities (Expressive and Receptive Language). Ratio developmental quotients (average age equivalent/chronological age \* 100) were calculated to provide nonverbal, verbal and combined IQ estimates.

##### *Differential Abilities Scales-II (Elliot, 2007; DAS-II)*

The DAS-II is a standardized measure of cognitive abilities children 2.5-17 years of age. At T3, most participants completed the core battery of the DAS-II Upper Early Years or School Age form. DAS-II verbal cluster, Special Nonverbal Composite and General Conceptual Ability scores provided estimates of verbal, nonverbal and combined IQ. Children who were unable to achieve basal scores on the DAS-II were administered the MSEL at Time 3, and ratio development quotients were calculated to provide nonverbal, verbal and combined IQ estimates.

##### *Autism Diagnostic Observation Schedule (Lord et al., 2000; ADOS)*

The Autism Diagnostic Observation Schedule is a semi-structured standardized observation administered by a trained clinician. Diagnostic classification is based upon exceeding a threshold in a combined Social Affect and Restricted and Restricted and Repetitive Behavior score, and severity scores provide estimates of social affect and restricted and repetitive behavior symptoms

that can be compared across ADOS modules (Gotham, Pickles, & Lord, 2009; Hus, Gotham, & Lord, 2014).

*Autism Diagnostic Interview-Revised (Rutter, Le Couteur, & Lord, 2003; ADI-R)*

The ADI-R is a clinician administered semi-structured caregiver interview, inquiring about past and current ASD symptoms. Diagnostic classification is based upon Language and Communication, Reciprocal Social Interaction and Restricted and Repetitive Patterns of Behavior algorithm total scores.

*Vineland Adaptive Behavior Scales, Second Edition (Sparrow, Balla, & Cicchetti, 2005).*

The Parent/Caregiver Rating Form of the Vineland Adaptive Behavior Scales (VABS-II) was completed by caregivers to assess adaptive behavior in Communication, Daily Living Skills and Socialization domains, yielding standard domain scores and a combined Adaptive Behavior Composite (ABC).

#### References for Measures

1. Elliott CD. Differential ability scales (2nd ed), Pearson, San Antonio, TX; 2007
2. Lord C, Risi S, Lambrecht L, Cook EH, Jr., Leventhal BL, DiLavore PC, Pickles A, Rutter M. The autism diagnostic observation schedule-generic: a standard measure of social and communication deficits associated with the spectrum of autism. *Journal of Autism and Developmental Disorders*. 2000;30(3):205-223.
3. Lord C, Rutter M, DiLavore PC, Risi S, Gotham K, Bishop S. Autism diagnostic observation schedule: ADOS-2: Western Psychological Services; 2012.

4. Lord C, Rutter M, Le Couteur A. Autism diagnostic interview-revised: A revised version of a diagnostic interview for caregivers of individuals with possible pervasive developmental disorders. *Journal of Autism and Developmental Disorders*. 1994;24(5):659-685.
5. Mullen EM. Mullen Scales of Early Learning. American Guidance Service, Inc; 1995.
6. Sparrow SS, Cicchetti DV, Balla DA. Vineland Adaptive Behavior Scales, Second Edition. San Antonio, TX: Pearsonl 2005.

Table S1. Parental Education, Family Income, Child Race and Ethnicity by Diagnosis and Sex

|                                                                 | TD-M          | ASD-M          | TD-F          | ASD-F         |
|-----------------------------------------------------------------|---------------|----------------|---------------|---------------|
|                                                                 | <i>n</i> = 60 | <i>n</i> = 137 | <i>n</i> = 50 | <i>n</i> = 63 |
| Maternal Education <sup>a</sup> (years), <i>M</i> ( <i>SD</i> ) | 15.2 (2.0)    | 14.7 (1.9)     | 16.5 (2.2)    | 15.4 (2.4)    |
| Paternal Education <sup>b</sup> (years), <i>M</i> ( <i>SD</i> ) | 14.4 (2.1)    | 14.1 (2.2)     | 14.8 (2.4)    | 15.1 (2.8)    |
| Family Income, <i>n</i> (%)                                     |               |                |               |               |
| \$49,000 or less                                                | 10 (16.7%)    | 23 (16.8%)     | 3 (6.0%)      | 13 (20.6%)    |
| \$50,000-\$74,999                                               | 6 (10.0%)     | 15 (10.9%)     | 10 (20.0%)    | 10 (15.9%)    |
| \$75,000-\$99,999                                               | 5 (8.3%)      | 11 (8.0%)      | 7 (14.0%)     | 7 (11.1%)     |
| \$100,000-\$149,999                                             | 10 (16.7%)    | 5 (5.1%)       | 14 (28.0%)    | 6 (9.5%)      |
| \$150,000 and above                                             | 8 (13.3%)     | 14 (10.2%)     | 5 (10.0%)     | 7 (11.1%)     |
| Refused/Missing                                                 | 21 (35.0%)    | 67 (48.9%)     | 11 (22.0%)    | 20 (31.7%)    |
| Child Race, <i>n</i> (%)                                        |               |                |               |               |
| African American                                                | 1 (1.7%)      | 6 (4.4%)       | 1 (2.0%)      | 1 (1.6%)      |
| Asian                                                           | 3 (3.3%)      | 6 (4.4%)       | 2 (4.0%)      | 6 (9.5%)      |
| White                                                           | 43 (71.7%)    | 83 (60.6%)     | 33 (66.0%)    | 37 (58.7%)    |
| Native American                                                 | –             | 1 (0.7%)       | –             | –             |
| Multiracial                                                     | 7 (11.7%)     | 18 (13.1%)     | 8 (16.0%)     | 7 (11.1%)     |
| Not Provided/Missing                                            | 7 (11.7%)     | 23 (16.8%)     | 6 (12.0%)     | 12 (19.0%)    |
| Child Ethnicity, <i>n</i> (%)                                   |               |                |               |               |
| Hispanic                                                        | 10 (16.7%)    | 25 (18.2%)     | 12 (24.0%)    | 16 (25.4%)    |
| Non-Hispanic                                                    | 45 (75.0%)    | 89 (65.0%)     | 32 (64.0%)    | 36 (57.1%)    |
| Not Provided/Missing                                            | 5 (8.3%)      | 23 (16.8%)     | 6 (12.0%)     | 11 (17.5%)    |

Abbreviations: TD: Typically Developing; TD-M: Typically Developing Male participants; ASD: Autism Spectrum Disorder; ASD-M: ASD Male participants; TD-F: Typically Developing Female participants; ASD-F: ASD Female participants.

<sup>a</sup>Missing data: TD-M (*n* = 6), ASD-M (*n* = 22), TD-F (*n* = 4), and ASD-F (*n* = 11).

<sup>b</sup>Missing data: TD-M (*n* = 11), ASD-M (*n* = 35), TD-F (*n* = 10), and ASD-F (*n* = 13).

Table S2. Summary of the Mixed Effects Model examining the Effect of Diagnostic Group and Sex on Trajectories of Left and Right Hippocampal Volumes (mm<sup>3</sup>), Unadjusted for Hemisphere Volume

| Effect            | Left     |           |                 | Right    |           |                 |
|-------------------|----------|-----------|-----------------|----------|-----------|-----------------|
|                   | Estimate | <i>SE</i> | <i>P</i> -value | Estimate | <i>SE</i> | <i>P</i> -value |
| Intercept         | 3407.60  | 34.59     | <0.001          | 3604.14  | 36.26     | <0.001          |
| Age (months)      | 17.50    | 0.89      | <0.001          | 14.96    | 1.03      | <0.001          |
| ASD Diagnosis     | 36.35    | 37.84     | 0.34            | 61.81    | 39.68     | 0.12            |
| Female Sex        | -226.03  | 37.69     | <0.001          | -228.91  | 39.54     | <0.001          |
| Age*ASD Diagnosis | -1.18    | 0.80      | 0.14            | 0.84     | 0.92      | 0.36            |
| Age*Female Sex    | -1.66    | 0.86      | 0.055           | -1.92    | 0.99      | 0.053           |
| Age*Age           | -0.12    | 0.03      | <0.001          | -0.10    | 0.03      | 0.002           |

Note: Age was centered at 38 months. Thus, the intercept represents predicted hippocampal volume (in mm<sup>3</sup>) for 38 months old TD males.

Abbreviations: ASD: Autism Spectrum Disorder; SE: Standard Error; TD: Typically developing.

Table S3. Estimated Differences Between Children with ASD and Same Sex and Age Children with TD and 95% Confidence Intervals (CI) for Left and Right Hippocampus Volumes (mm<sup>3</sup>)

| Age  | Left              |                                                     |                 | Right             |                                                     |                 |
|------|-------------------|-----------------------------------------------------|-----------------|-------------------|-----------------------------------------------------|-----------------|
|      | Hemisphere Volume | Estimated Difference in Hippocampus Volume (95% CI) | <i>P</i> -value | Hemisphere Volume | Estimated Difference in Hippocampus Volume (95% CI) | <i>P</i> -value |
| 29.3 | 460057            | -41 (-110 to 28)                                    | 0.24            | 459811            | -62 (-142 to 18)                                    | 0.13            |
| 29.3 | 491832            | -4 (-67 to 60)                                      | 0.91            | 488411            | -15 (-85 to 54)                                     | 0.66            |
| 29.3 | 508164            | 16 (-51 to 83)                                      | 0.64            | 522689            | 40 (-37 to 117)                                     | 0.31            |
| 34.5 | 441266            | -81 (-166 to 4)                                     | 0.06            | 447367            | -92 (-186 to 2)                                     | 0.055           |
| 34.5 | 476059            | -40 (-105 to 26)                                    | 0.23            | 482670            | -35 (-106 to 36)                                    | 0.33            |
| 34.5 | 537441            | 33 (-41 to 107)                                     | 0.38            | 540418            | 59 (-20 to 138)                                     | 0.14            |
| 37.9 | 461328            | -68 (-144 to 7)                                     | 0.08            | 466421            | -68 (-151 to 16)                                    | 0.11            |
| 37.9 | 485730            | -39 (-103 to 24)                                    | 0.22            | 501367            | -11 (-77 to 55)                                     | 0.74            |
| 37.9 | 533435            | 17 (-50 to 85)                                      | 0.62            | 539742            | 51 (-22 to 125)                                     | 0.17            |
| 41.1 | 465802            | -74 (-151 to 3)                                     | 0.06            | 470669            | -67 (-151 to 17)                                    | 0.12            |
| 41.1 | 518911            | -11 (-71 to 50)                                     | 0.73            | 524289            | 20 (-45 to 85)                                      | 0.55            |
| 41.1 | 549531            | 26 (-47 to 98)                                      | 0.49            | 556396            | 72 (-7 to 151)                                      | 0.07            |
| 44.3 | 468571            | <b>-81 (-161 to -1)</b>                             | <b>0.047</b>    | 466941            | -79 (-171 to 13)                                    | 0.09            |
| 44.3 | 513244            | -28 (-89 to 33)                                     | 0.36            | 511818            | -6 (-72 to 59)                                      | 0.85            |
| 44.3 | 535316            | -2 (-65 to 61)                                      | 0.96            | 534262            | 30 (-36 to 96)                                      | 0.37            |
| 47.4 | 482382            | -75 (-151 to 0)                                     | 0.051           | 488476            | -50 (-130 to 30)                                    | 0.22            |
| 47.4 | 510973            | -41 (-104 to 21)                                    | 0.20            | 517198            | -4 (-70 to 62)                                      | 0.91            |
| 47.4 | 542317            | -4 (-68 to 60)                                      | 0.90            | 544136            | 40 (-27 to 107)                                     | 0.24            |
| 52.1 | 484186            | <b>-88 (-170 to -7)</b>                             | <b>0.03</b>     | 479695            | -73 (-168 to 21)                                    | 0.13            |
| 52.1 | 555198            | -4 (-70 to 62)                                      | 0.90            | 554619            | 48 (-21 to 117)                                     | 0.17            |
| 52.1 | 576052            | 21 (-56 to 97)                                      | 0.59            | 587325            | <b>101 (14 to 188)</b>                              | <b>0.02</b>     |
| 56.2 | 510114            | -71 (-144 to 1)                                     | 0.055           | 512678            | -28 (-106 to 50)                                    | 0.48            |
| 56.2 | 565563            | -5 (-74 to 63)                                      | 0.88            | 569693            | 65 (-9 to 138)                                      | 0.08            |
| 56.2 | 581435            | 13 (-63 to 90)                                      | 0.73            | 595767            | <b>107 (18 to 196)</b>                              | <b>0.02</b>     |
| 61.4 | 504845            | <b>-95 (-180 to -10)</b>                            | <b>0.03</b>     | 510155            | -42 (-131 to 47)                                    | 0.35            |
| 61.4 | 553334            | -37 (-105 to 30)                                    | 0.28            | 551678            | 25 (-46 to 97)                                      | 0.49            |
| 61.4 | 581856            | -3 (-77 to 70)                                      | 0.93            | 587780            | <b>84 (4 to 164)</b>                                | <b>0.04</b>     |
| 68.3 | 516058            | <b>-105 (-195 to -14)</b>                           | <b>0.02</b>     | 513304            | -50 (-152 to 51)                                    | 0.33            |
| 68.3 | 552723            | -61 (-135 to 13)                                    | 0.11            | 556743            | 20 (-58 to 99)                                      | 0.61            |
| 68.3 | 591029            | -15 (-91 to 61)                                     | 0.69            | 600893            | <b>92 (6 to 177)</b>                                | <b>0.04</b>     |

Note: Using the TD group, we divided the data in 10 age groups. For each of these age groups, we calculated 3 values of the hemisphere volume, using only TD children: lowest 20%, median, and highest 20%. We then estimated differences in hippocampus volume between children with ASD and same sex and age TD children at each age for each of the 3 values of hemisphere volume. For each age level, the first hemisphere value represents the lowest 20% value, the second the median, and the third the highest 20% hemisphere value. Results suggest that in

individuals with larger hemisphere volumes, ASD children had relatively larger hippocampi than same age and sex TD children of similar hemisphere volume, whereas in individuals with smaller hemisphere volumes ASD children had relatively smaller hippocampi than same age and sex TD children with similar hemisphere volume. Differences that reach significance are indicated in bold.

Table S4. Participant Behavioral Descriptive Information by Diagnosis/Neurophenotype Group

| <b>Time 1</b>       | TD-M<br>( <i>n</i> = 60) |          |           | ASD-N<br>( <i>n</i> = 120) |          |           | ASD-DM<br>( <i>n</i> = 17) |          |           | TD-F<br>( <i>n</i> = 50) |          |           | ASD-F<br>( <i>n</i> = 63) |          |           |
|---------------------|--------------------------|----------|-----------|----------------------------|----------|-----------|----------------------------|----------|-----------|--------------------------|----------|-----------|---------------------------|----------|-----------|
|                     | <i>n</i>                 | <i>M</i> | <i>SD</i> | <i>n</i>                   | <i>M</i> | <i>SD</i> | <i>n</i>                   | <i>M</i> | <i>SD</i> | <i>n</i>                 | <i>M</i> | <i>SD</i> | <i>n</i>                  | <i>M</i> | <i>SD</i> |
| VDQ                 | 59                       | 105.4    | 12.1      | 120                        | 57.8     | 27.1      | 17                         | 53.6     | 26.9      | 50                       | 109.6    | 13.3      | 62                        | 59.2     | 29.2      |
| NVDQ                | 59                       | 102.6    | 14.4      | 120                        | 73.3     | 19.5      | 17                         | 70.7     | 18.7      | 50                       | 109.7    | 13.0      | 62                        | 72.1     | 19.9      |
| VABS-II ABC         | 54                       | 110.4    | 13.3      | 111                        | 77.4     | 11.2      | 15                         | 77.1     | 11.4      | 43                       | 111.3    | 12.2      | 57                        | 70.8     | 10.2      |
| ADOS CSS            |                          |          |           | 119                        | 7.5      | 1.6       | 16                         | 7.3      | 2.1       |                          |          |           | 63                        | 7.5      | 1.8       |
| ADI                 |                          |          |           |                            |          |           |                            |          |           |                          |          |           |                           |          |           |
| Communication Total |                          |          |           | 120                        | 9.6      | 2.7       | 17                         | 9.6      | 2.6       |                          |          |           | 63                        | 10.3     | 2.8       |
| Social Total        |                          |          |           | 120                        | 16.7     | 4.0       | 16                         | 17.3     | 4.8       |                          |          |           | 63                        | 18.1     | 4.0       |
| Behavior Total      |                          |          |           | 120                        | 5.5      | 2.0       | 16                         | 5.3      | 2.1       |                          |          |           | 63                        | 5.4      | 1.9       |
| <b>Time 3</b>       | TD-M<br>( <i>n</i> = 29) |          |           | ASD-N<br>( <i>n</i> = 42)  |          |           | ASD-DM<br>( <i>n</i> = 8)  |          |           | TD-F<br>( <i>n</i> = 20) |          |           | ASD-F<br>( <i>n</i> = 13) |          |           |
|                     | <i>n</i>                 | <i>M</i> | <i>SD</i> | <i>n</i>                   | <i>M</i> | <i>SD</i> | <i>n</i>                   | <i>M</i> | <i>SD</i> | <i>n</i>                 | <i>M</i> | <i>SD</i> | <i>n</i>                  | <i>M</i> | <i>SD</i> |
| VIQ                 | 23                       | 110.1    | 9.9       | 37                         | 77.2     | 36.0      | 6                          | 80.0     | 32.7      | 17                       | 113.6    | 9.9       | 13                        | 78.9     | 34.4      |
| NVIQ                | 23                       | 110.3    | 10.9      | 37                         | 88.0     | 30.4      | 6                          | 84.3     | 25.7      | 17                       | 111.1    | 12.3      | 13                        | 83.5     | 36.7      |
| VABS-II ABC         | 23                       | 111.6    | 10.8      | 33                         | 76.7     | 17.2      | 6                          | 84.5     | 16.7      | 16                       | 115.7    | 12.4      | 12                        | 70.3     | 10.8      |
| ADOS CSS            |                          |          |           | 38                         | 7.2      | 2.1       | 6                          | 5.8      | 3.3       |                          |          |           | 13                        | 6.7      | 2.2       |

Abbreviations: ASD: Autism Spectrum Disorder; ASD-F: ASD female participants; DM: Disproportionate Megalencephaly; ASD-DM: ASD male participants with DM; ASD-N: ASD male participants without DM; TD: Typically developing; TD-M: TD male participants TD-F: TD female participants; ADI: Autism Diagnostic Interview-Revised; ADOS CSS: Autism Diagnostic Observation Schedule, Calibrated Severity Score; VABS-II ABC: Vineland Adaptive Behavior Scales-II Adaptive Behavior Composite; NVDQ; Nonverbal developmental quotient; VDQ; Verbal developmental quotient; VIQ: Verbal IQ; NVIQ: Nonverbal IQ.



Table S5. Summary Statistics for Age, Hippocampal and Hemisphere Volumes (in mm<sup>3</sup>) at T1, T2, T3 by Diagnostic/Neurophenotype Group

|               | TD-M<br>( <i>n</i> = 60) |          |           | ASD-N<br>( <i>n</i> = 120) |          |           | ASD-DM<br>( <i>n</i> = 17) |          |           | TD-F<br>( <i>n</i> = 50) |          |           | ASD-F<br>( <i>n</i> = 63) |          |           |
|---------------|--------------------------|----------|-----------|----------------------------|----------|-----------|----------------------------|----------|-----------|--------------------------|----------|-----------|---------------------------|----------|-----------|
|               | <i>n</i>                 | <i>M</i> | <i>SD</i> | <i>n</i>                   | <i>M</i> | <i>SD</i> | <i>n</i>                   | <i>M</i> | <i>SD</i> | <i>n</i>                 | <i>M</i> | <i>SD</i> | <i>n</i>                  | <i>M</i> | <i>SD</i> |
| <b>Time 1</b> |                          |          |           |                            |          |           |                            |          |           |                          |          |           |                           |          |           |
| Age (months)  | 60                       | 37.0     | 6.4       | 120                        | 38.0     | 6.4       | 17                         | 35.3     | 4.7       | 50                       | 38.8     | 6.8       | 63                        | 39.6     | 6.5       |
| L HV          | 56                       | 3359.6   | 289.9     | 119                        | 3405.6   | 313.6     | 16                         | 3657.3   | 365.7     | 47                       | 3202.7   | 275.8     | 63                        | 3221.8   | 351.2     |
| R HV          | 56                       | 3541.1   | 286.6     | 119                        | 3617.3   | 344.3     | 16                         | 3921.3   | 304.3     | 47                       | 3390.3   | 288.5     | 63                        | 3438.1   | 348.2     |
| L Hemisphere  | 58                       | 509233   | 42155     | 120                        | 523361   | 38310     | 17                         | 580709   | 33344     | 50                       | 480206   | 34980     | 63                        | 489477   | 46034     |
| R Hemisphere  | 58                       | 516059   | 42158     | 120                        | 532127   | 38642     | 17                         | 587308   | 30556     | 50                       | 483933   | 35870     | 63                        | 493670   | 45430     |
| <b>Time 2</b> |                          |          |           |                            |          |           |                            |          |           |                          |          |           |                           |          |           |
| Age (months)  | 43                       | 50.4     | 6.5       | 70                         | 50.5     | 6.3       | 11                         | 48.1     | 6.5       | 28                       | 51.8     | 6.1       | 28                        | 54.7     | 7.3       |
| L HV          | 43                       | 3584.8   | 298.6     | 70                         | 3591.0   | 342.6     | 11                         | 4008.0   | 310.6     | 28                       | 3387.9   | 278.0     | 28                        | 3466.8   | 329.4     |
| R HV          | 43                       | 3773.1   | 300.8     | 70                         | 3810.1   | 351.7     | 11                         | 4201.5   | 254.2     | 28                       | 3576.9   | 268.0     | 28                        | 3663.8   | 318.7     |
| L Hemisphere  | 43                       | 544535   | 45730     | 70                         | 555526   | 39193     | 11                         | 621058   | 44100     | 28                       | 511083   | 40317     | 28                        | 516098   | 42637     |
| R Hemisphere  | 43                       | 550377   | 45373     | 70                         | 561891   | 40537     | 11                         | 624296   | 39723     | 28                       | 514474   | 41922     | 28                        | 520072   | 40647     |
| <b>Time 3</b> |                          |          |           |                            |          |           |                            |          |           |                          |          |           |                           |          |           |
| Age (months)  | 29                       | 61.6     | 5.1       | 42                         | 64.0     | 5.8       | 8                          | 62.7     | 6.3       | 20                       | 65.5     | 6.8       | 13                        | 67.7     | 6.3       |
| L HV          | 29                       | 3786.0   | 272.8     | 42                         | 3780.0   | 333.9     | 8                          | 4213.1   | 288.9     | 20                       | 3593.5   | 344.4     | 13                        | 3605.4   | 397.5     |
| R HV          | 29                       | 3905.7   | 243.7     | 42                         | 3985.8   | 408.3     | 8                          | 4365.8   | 188.4     | 20                       | 3725.9   | 303.8     | 13                        | 3758.0   | 433.3     |
| L Hemisphere  | 29                       | 563830   | 40644     | 42                         | 581973   | 34852     | 8                          | 656505   | 30423     | 20                       | 532488   | 35574     | 13                        | 533040   | 45662     |
| R Hemisphere  | 29                       | 566987   | 40126     | 42                         | 585954   | 35252     | 8                          | 657652   | 28417     | 20                       | 535660   | 36030     | 13                        | 535763   | 44506     |

Abbreviations: ASD: Autism Spectrum Disorder; ASD-F: ASD female participants; DM: Disproportionate Megalencephaly; ASD-DM: ASD male participants with DM; ASD-N: ASD male participants without DM; L: Left; R: Right; HV: Hippocampal Volume; TD: Typically developing; TD-F: TD female participants; TD-M: TD male participants.

Table S6. Summary of the Mixed Effects Linear Models Examining the Effect of Disproportionate Megalencephaly (DM) Status, Diagnostic Group, Sex, and Hemisphere Volume on Left and Right Hippocampal Volumes (mm<sup>3</sup>)

| Effect                               | Left     |       |         | Right    |        |         |
|--------------------------------------|----------|-------|---------|----------|--------|---------|
|                                      | Estimate | SE    | P-value | Estimate | SE     | P-value |
| <b>Unadjusted Analyses</b>           |          |       |         |          |        |         |
| Intercept                            | 3396.64  | 33.73 | <0.001  | 3591.42  | 35.19  | <0.001  |
| Female Sex                           | -202.07  | 37.13 | <0.001  | -200.81  | 38.77  | <0.001  |
| Age (months)                         | 17.38    | 0.86  | <0.001  | 14.93    | 1.03   | <0.001  |
| ASD Diagnosis                        | 13.12    | 37.26 | 0.73    | 34.40    | 38.89  | 0.38    |
| Age*Female Sex                       | -1.35    | 0.83  | 0.11    | -1.84    | 1.00   | 0.07    |
| Age*ASD Diagnosis                    | -1.58    | 0.78  | .04     | 0.72     | 0.94   | 0.44    |
| Age*Age                              | -0.12    | 0.03  | <0.001  | -0.10    | 0.03   | 0.002   |
| DM Status                            | 320.32   | 78.36 | <0.001  | 368.2    | 81.63  | <0.001  |
| Age*DM Status                        | 4.32     | 1.53  | 0.006   | 1.37     | 1.85   | 0.46    |
| <b>Adjusted Analyses</b>             |          |       |         |          |        |         |
| Intercept                            | 3336.54  | 28.36 | <0.001  | 3511.26  | 31.00  | <0.001  |
| Female Sex                           | -68.21   | 32.57 | 0.04    | -55.50   | 35.59  | 0.12    |
| Age (months)                         | 8.62     | 1.36  | <0.001  | 7.45     | 1.51   | <0.001  |
| ASD Diagnosis                        | -24.69   | 31.10 | 0.43    | -18.78   | 33.97  | 0.58    |
| Hemisphere Volume (cm <sup>3</sup> ) | 3.06     | 0.46  | <0.001  | 2.73     | 0.51   | <0.001  |
| Age*Female Sex                       | -0.52    | 0.80  | 0.52    | -1.17    | 0.97   | 0.23    |
| Age*ASD Diagnosis                    | -3.32    | 1.36  | 0.02    | -1.61    | 1.49   | 0.28    |
| Age*Age                              | -0.04    | 0.03  | 0.16    | -0.02    | 0.03   | 0.53    |
| Hemisphere* ASD Diagnosis            | 1.03     | 0.56  | 0.07    | 1.45     | 0.62   | 0.02    |
| DM Status                            | 37.94    | 135.2 | 0.78    | 141.09   | 176.16 | 0.42    |
| Age*DM Status                        | 3.03     | 3.49  | 0.38    | 1.10     | 4.25   | 0.80    |
| Hemisphere*DM Status                 | 0.13     | 1.37  | 0.92    | -0.45    | 1.73   | 0.80    |

Note: Age was centered at 38 months and hemisphere is centered at 498.9 cm<sup>3</sup> (average hemisphere volume for 38 months old TD children). Thus, the intercepts represent predicted hippocampus volumes for 38 months old TD male children with hemisphere volume of 498.9 cm<sup>3</sup>. In these models the DM effect was entered as an interaction with diagnosis and sex. Thus, the effect for DM can be interpreted as the estimated difference in volume between ASD-DM boys and same-age ASD boys without DM. The interaction between DM and age is interpreted as the difference in linear growth rate between ASD-DM boys and same-age ASD boys.

Abbreviations: ASD: Autism Spectrum Disorder; DM: Disproportionate Megalencephaly; SE: Standard Error; TD: Typically developing.

Table S7. Summary of the Mixed Effects Linear Models Examining Asymmetry

| Effect                        | Estimate | SE    | P-value |
|-------------------------------|----------|-------|---------|
| Intercept                     | 3347.90  | 29.16 | <0.001  |
| Female Sex                    | -71.12   | 32.90 | 0.03    |
| ASD Diagnosis                 | -29.34   | 31.96 | 0.36    |
| Right Side                    | 160.16   | 11.04 | <0.001  |
| Right Side*ASD Diagnosis      | 25.46    | 13.99 | 0.07    |
| Hemisphere (cm <sup>3</sup> ) | 2.64     | 0.45  | <0.001  |
| Hemisphere*ASD Diagnosis      | 1.49     | 0.53  | 0.005   |
| Age (months)                  | 8.70     | 1.35  | <0.001  |
| Age*ASD Diagnosis             | -2.78    | 1.31  | 0.03    |
| Age*Female Sex                | -0.95    | 0.83  | 0.25    |
| Age*Age                       | -0.03    | 0.03  | 0.25    |

Note: Age was centered at 38 months and hemisphere is centered at 498.9 cm<sup>3</sup> (average hemisphere volume for 38 months old TD children). Thus, the intercept represents predicted left hippocampus volume for 38 months old TD males with hemisphere volume of 498.9 cm<sup>3</sup>.

Abbreviations: ASD: Autism Spectrum Disorder; SE: Standard Error; TD: Typically developing.

Figure S1. Other Studies of Hippocampal Volume in those with ASD and TD From Birth to Age 16: ASD-M and TD-M Represent the Current Study

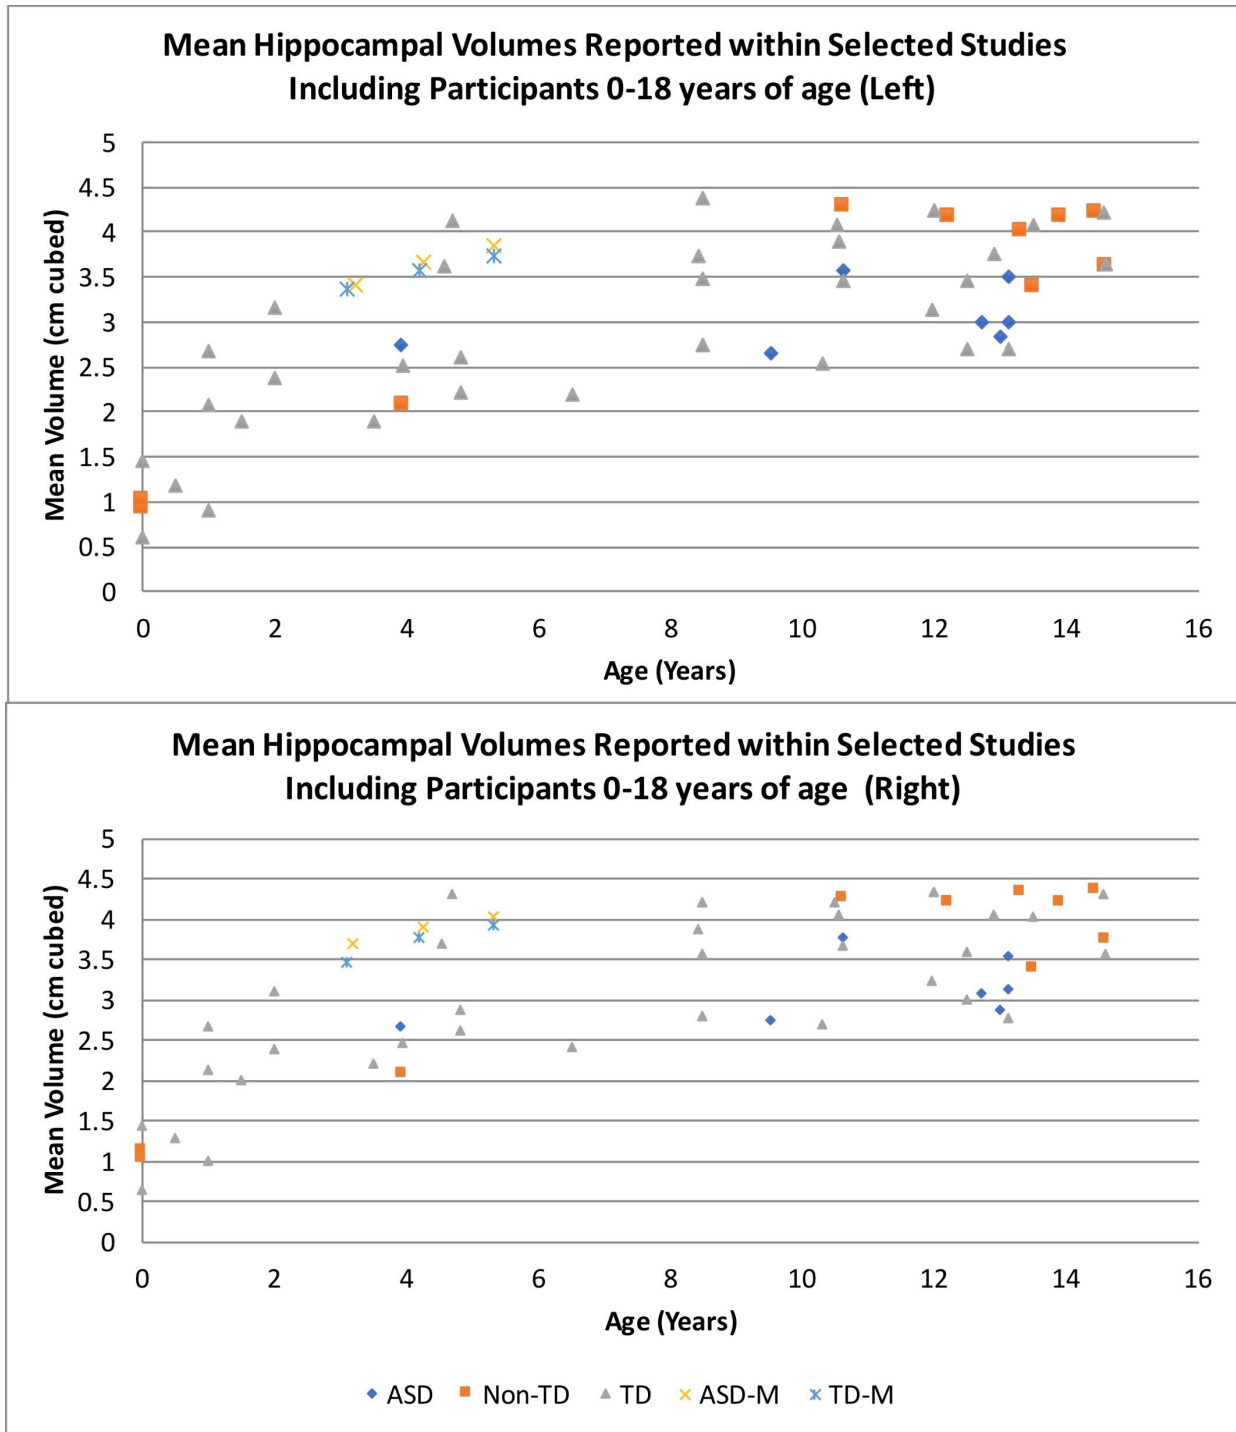

Note: A list of studies reviewed for this Figure follows after Figure S3.

Abbreviations: ASD: Autism Spectrum Disorder; ASD-M: Male participants with ASD; SE: Standard Error; TD: Typically developing; TD-M: Male participants with TD.

Figure S2. Estimated Left and Right ASD and TD Hippocampus Volumes for Male and Female Children to Illustrate the Interaction Between Hemisphere Volume and Diagnosis.

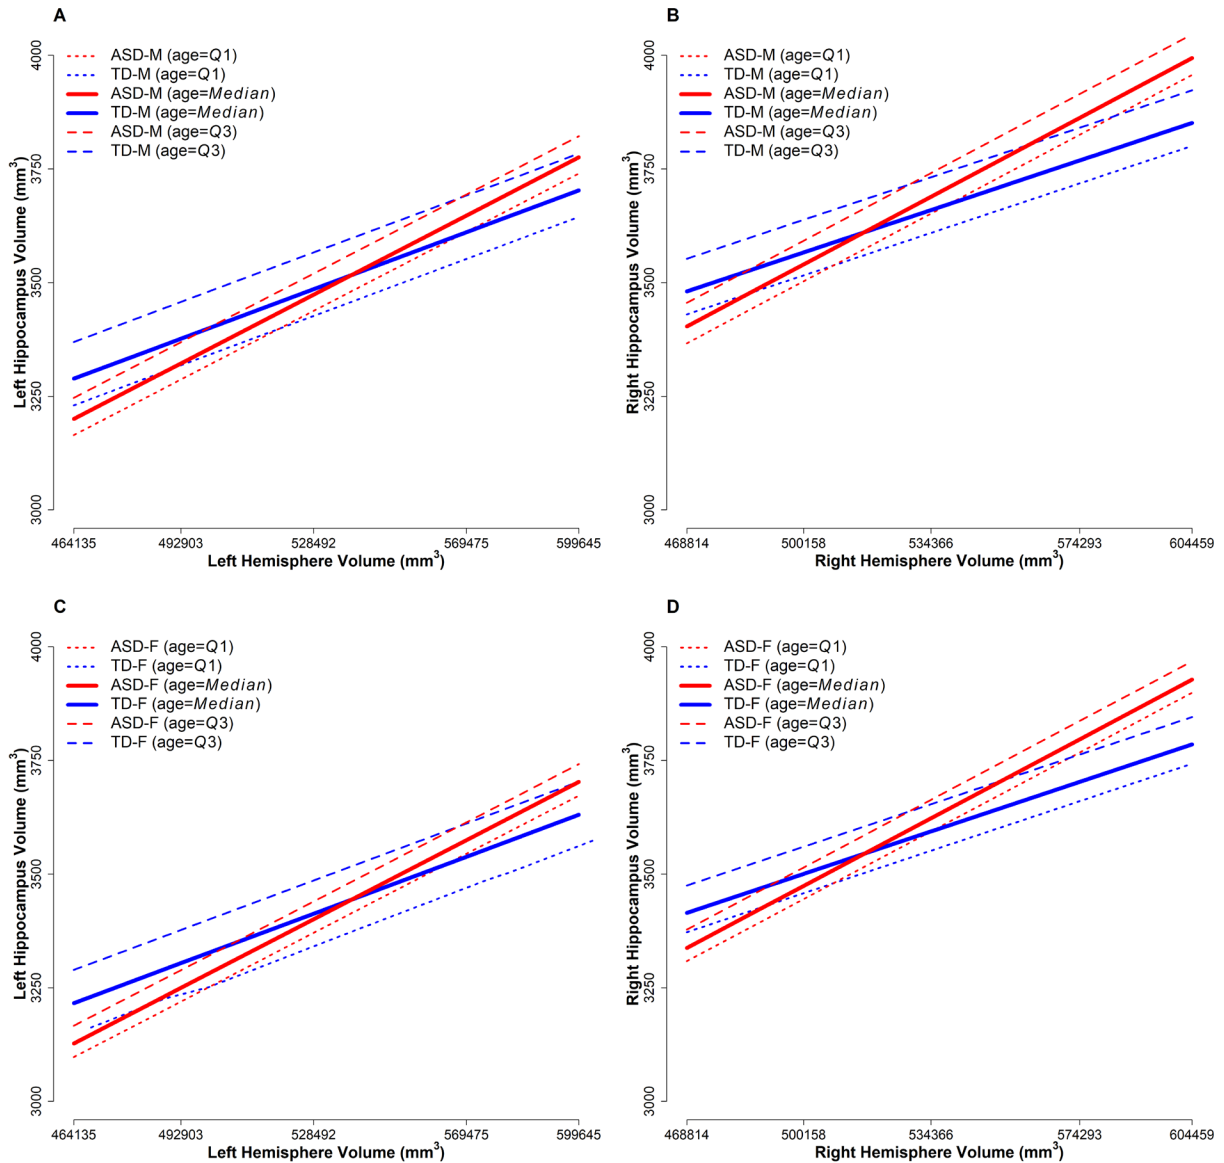

Note: We calculated the first quartile ( $Q1=38$  months), *Median* (45 months), and third quartile ( $Q3=55$  months) for ages in our sample. At each of these three age levels, we used the adjusted models to calculate predicted hippocampal volumes at lowest 10%, first quartile, median, third quartile, and highest 10% values of hemisphere volume for male (panels A, B) and female (panels C, D) children with ASD and TD. Plots indicate that in individuals with larger hemisphere volumes, both male and female children with ASD had relatively larger hippocampi than same age and sex TD children of similar hemisphere volume, whereas in individuals with smaller hemisphere volumes both male and female ASD children had relatively smaller hippocampi than same age and sex TD children with similar hemisphere volume.

Figure S3. Scatterplot of Child-Specific Hippocampal Linear Slope Against T1 Vineland Adaptive Behavior Composite Score in Boys with ASD

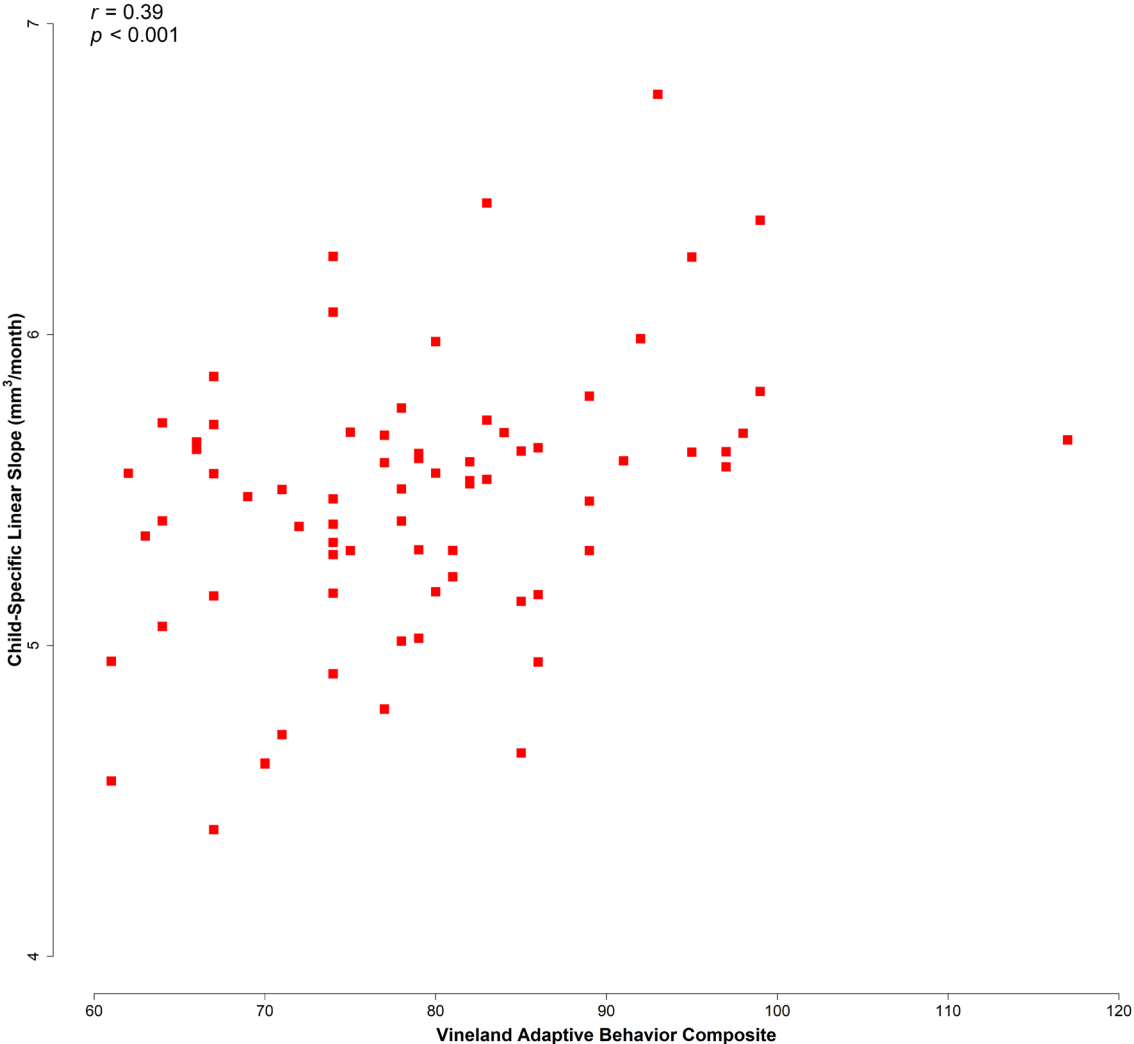

### Studies Reviewed for Figure S1

1. Albaugh MD, Orr C, Charani B, Althoff RR, Allgaier N, D'Alberto N, Hudson K, Mackey S, Spechler PA, Banaschewski T, Brühl R. Inattention and reaction time variability are linked to ventromedial prefrontal volume in adolescents. *Biological psychiatry*. 2017 Nov 1;82(9):660-8.
2. Barnea-Goraly N, Raman M, Mazaika P, Marzelli M, Hershey T, Weinzimer SA, Aye T, Buckingham B, Mauras N, White NH, Fox LA. Alterations in white matter structure in young children with type 1 diabetes. *Diabetes care*. 2014 Feb 1;37(2):332-40.
3. Chang K, Karchemskiy A, Barnea-Goraly N, Garrett A, Simeonova DI, Reiss A. Reduced amygdalar gray matter volume in familial pediatric bipolar disorder. *Journal of the American Academy of Child & Adolescent Psychiatry*. 2005 Jun 1;44(6):565-73.
4. De Bellis MD, Hall J, Boring AM, Frustaci K, Moritz G. A pilot longitudinal study of hippocampal volumes in pediatric maltreatment-related posttraumatic stress disorder. *Biological psychiatry*. 2001 Aug 15;50(4):305-9.
5. Gilmore JH, Schmitt JE, Knickmeyer RC, Smith JK, Lin W, Styner M et al. Genetic and environmental contributions to neonatal brain structure: a twin study. *Hum Brain Mapp* 2010; 31: 1174–1182
6. Isaacs EB, Lucas A, Chong WK, Wood SJ, Johnson CL, Marshall C, Vargha-Khadem F, Gadian DG. Hippocampal volume and everyday memory in children of very low birth weight. *Pediatric research*. 2000 Jun;47(6):713.
7. Juranek J, Filipek PA, Berenji GR, Modahl C, Osann K, Spence MA. Association between amygdala volume and anxiety level: magnetic resonance imaging (MRI) study in autistic children. *Journal of child neurology*. 2006 Dec;21(12):1051-8.

8. Khan SA, Keaser ML, Meiller TF, Seminowicz DA. Altered structure and function in the hippocampus and medial prefrontal cortex in patients with burning mouth syndrome. *PAIN®*. 2014 Aug 1;155(8):1472-80.
9. Knickmeyer RC, Gouttard S, Kang C, Evans D, Wilber K, Smith JK, Hamer RM, Lin W, Gerig G, Gilmore JH. A structural MRI study of human brain development from birth to 2 years. *Journal of Neuroscience*. 2008 Nov 19;28(47):12176-82.
10. Lodygensky GA, Seghier ML, Warfield SK, Tolsa CB, Sizonenko S, Lazeyras F, Hüppi PS. Intrauterine growth restriction affects the preterm infant's hippocampus. *Pediatric research*. 2008 Apr;63(4):438.
11. Luby JL, Belden A, Harms MP, Tillman R, Barch DM. Preschool is a sensitive period for the influence of maternal support on the trajectory of hippocampal development. *Proceedings of the national Academy of Sciences*. 2016 May 17;113(20):5742-7.
12. Lupien SJ, Parent S, Evans AC, Tremblay RE, Zelazo PD, Corbo V, Pruessner JC, Séguin JR. Larger amygdala but no change in hippocampal volume in 10-year-old children exposed to maternal depressive symptomatology since birth. *Proceedings of the National Academy of Sciences*. 2011 Aug 23;108(34):14324-9.
13. Nicolson R, DeVito TJ, Vidal CN, Sui Y, Hayashi KM, Drost DJ, Williamson PC, Rajakumar N, Toga AW, Thompson PM. Detection and mapping of hippocampal abnormalities in autism. *Psychiatry Research: Neuroimaging*. 2006 Nov 22;148(1):11-21.
14. Lauxen Peruzzolo T, Anes M, Kohmann AD, Souza AC, Rodrigues RB, Brun JB, Peters R, de Aguiar BW, Kapczinski F, Tramontina S, Rohde LA. Correlation between peripheral levels of brain-derived neurotrophic factor and hippocampal volume in children and adolescents with bipolar disorder. *Neural plasticity*. 2015;2015.



15. Pfluger T, Weil S, Weis S, Vollmar C, Heiss D, Egger J, Scheck R, Hahn K. Normative volumetric data of the developing hippocampus in children based on magnetic resonance imaging. *Epilepsia*. 1999 Apr;40(4):414-23.
16. Piven J, Bailey J, Ranson BJ, Arndt S. No difference in hippocampus volume detected on magnetic resonance imaging in autistic individuals. *Journal of autism and developmental disorders*. 1998 Apr 1;28(2):105-10.
17. Schumann CM, Hamstra J, Goodlin-Jones BL, Lotspeich LJ, Kwon H, Buonocore MH, Lammers CR, Reiss AL, Amaral DG. The amygdala is enlarged in children but not adolescents with autism; the hippocampus is enlarged at all ages. *Journal of neuroscience*. 2004 Jul 14;24(28):6392-401.
18. Schoemaker D, Buss C, Head K, Sandman CA, Davis EP, Chakravarty MM, Gauthier S, Pruessner JC. Hippocampus and amygdala volumes from magnetic resonance images in children: Assessing accuracy of FreeSurfer and FSL against manual segmentation. *NeuroImage*. 2016 Apr 1;129:1-4.
19. Sparks BF, Friedman SD, Shaw DW, Aylward EH, Echelard D, Artru AA, Maravilla KR, Giedd JN, Munson J, Dawson G, Dager SR. Brain structural abnormalities in young children with autism spectrum disorder. *Neurology*. 2002 Jul 23;59(2):184-92.
20. Szabó CÁ, Wyllie E, Siavalas EL, Najm I, Ruggieri P, Kotagal P, Lüders H. Hippocampal volumetry in children 6 years or younger: assessment of children with and without complex febrile seizures. *Epilepsy research*. 1999 Jan 1;33(1):1-9.
21. Tupler LA, De Bellis MD. Segmented hippocampal volume in children and adolescents with posttraumatic stress disorder. *Biological psychiatry*. 2006 Mar 15;59(6):523-9.

22. Utsunomiya H, Takano K, Okazaki M, Mitsudome A. Development of the temporal lobe in infants and children: analysis by MR-based volumetry. *American Journal of Neuroradiology*. 1999 Apr 1;20(4):717-23.
